# Supplementary material
Source: PubMed Central journal article supplement (PMC9438108)
Supplement: 12885_2022_9891_MOESM2_ESM.pdf [file 12885_2022_9891_MOESM2_ESM.pdf]

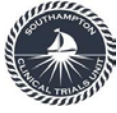

<TO BE PRINTED ON LOCAL HOSPITAL HEADED PAPER>

# ELEVA↑E

## INFORMED CONSENT FORM – TUMOUR SAMPLE SCREENING

**Study Title: An open label phase II trial of temozolomide prior to nivolumab in MGMT deficient, advanced oesophagogastric cancer**

**Researcher: Dr Elizabeth Smyth**

**ERGO Ref: 61191**

**REC: 21/EE/0017**

**IRAS: 282284**

*Please  
initial each  
box*

1. I confirm that I have read and understand the Tumour Sample Screening patient information sheet dated **[Insert here]** for the transfer of my tumour sample to the Laboratories of Cambridge University. I have had the opportunity to ask questions and these have been answered satisfactorily.
2. I understand that my participation is voluntary and that I am free to withdraw at any time, without giving a reason and without my medical care or legal rights being affected.
3. I understand that relevant sections of my medical records may be looked at by the individuals from the Southampton Clinical Trials Unit (SCTU), the Sponsor or their delegates, from Regulatory Authorities, or from the NHS Trust where it is relevant to the transfer and storage of my tumour block. I give permission for these individuals to have access to my records.
4. I give my permission for a sample of my tumour, previously obtained for diagnostic purposes, to be sent to the laboratories of Cambridge University in order to determine where a MGMT deficiency is present.
